23 **Abstract (297/300)**

24 **Background** Physical inactivity negatively affects gait performance and postural stability in older  
25 adults, which results in a higher risk of fall accidents. Previous research has shown that in-person  
26 dance training improves various aspects of balance and lower extremity function, however, the  
27 potential benefits of dance training delivered online on variables used for fall risk stratification in  
28 older adults have yet to be studied. We aimed to explore the benefits of a 12-week online dance  
29 training intervention on static and dynamic postural stability and gait speed in older adults.

30 **Methods** Forty-five older adults were included. The 12-week dance training intervention consisted  
31 of two weekly 60-min classes in improvisation and salsa delivered online through Zoom video calls.  
32 Static and dynamic postural stability was assessed using the center of pressure (CoP) area and  
33 velocity (force platform), and the Mini Balance Evaluation Systems Test (Mini-BESTest),  
34 respectively. 10-m gait speed was measured using photo gates. Before and after comparisons were  
35 performed using paired sample t-tests.

36 **Results** Thirty-two older adults completed the study. There were no significant changes for static  
37 postural stability assessed by CoP area or velocity ( $P \geq 0.218$ ). The Mini-BESTest total score was  
38 significantly improved at post-intervention ( $23.88 \pm 3.01$ ) compared to baseline ( $22.56 \pm 1.41$ ,  $P =$   
39  $0.007$ ). 10-m gait speed was significantly faster at post-intervention ( $1.68 \pm 0.25$  m/s) compared to  
40 baseline ( $1.57 \pm 0.22$  m/s,  $P < 0.001$ ).

41 **Discussion** These results indicate that online dance training has limited effect on static postural  
42 stability but may be beneficial for gait speed and in particular dynamic postural control among older  
43 adults. While the absolute increase in gait speed observed in the present study suggests limited  
44 clinical relevance, the improvement in Mini-BESTest score was above the minimal clinically  
45 important difference, which suggests a clinically relevant enhancement of dynamic postural control.

46 **Keywords**

47 Online dance training; physical activity; postural stability; gait speed; older adults.

48

## 49 Introduction

50 Physical inactivity negatively affects gait performance and postural stability in older adults, which  
51 results in a higher risk of fall accidents. Medical costs related to falls in older adults were estimated  
52 to be approximately \$50 billion per year in the USA alone (1). This is a concerning public health  
53 problem, as around 30% of the older adult population is expected to experience an accidental fall  
54 within a one-year time period (2). Common outcomes from fall accidents in older adults are: head  
55 injuries (3), fear of falling (4), loss of physical independence (5), increased healthcare utilization  
56 (6), and mortality (7), among others.

57 Physical training has been shown to improve risk factors and prevent fall accidents  
58 among older adults by focusing on improving gait and balance stability deficits (8). In the current  
59 world guidelines for fall prevention, dynamic gait evaluations are used for stratification of older  
60 adults in relation to fall risk (9). The Mini Balance Evaluation Systems Test (Mini-BESTest) has  
61 been extensively used in clinical settings to evaluate anticipatory and reactive postural responses  
62 and gait dynamics (10) due to its high construct validity and ability to discriminate between groups  
63 with respect to fall risk in older adults (11). Furthermore, low gait speed has previously been  
64 correlated with increased risk for accidental fall in community-dwelling older adults (12), a risk that  
65 is specifically amplified when gait speed is lower than 1 m/s (13). Jointly, these studies indicate the  
66 importance of physically active aging in preventing fall accidents.

67 According to systematic reviews, dance training is a valuable health promotion  
68 intervention for supporting healthy aging and addressing risk factors with declining health (14), and  
69 for mitigating fall risk (15). Specifically, dancing is an enjoyable physical activity that can be  
70 tailored to different cultural and aging backgrounds, and the physical needs of older adults; can  
71 improve physical health outcomes; and has the potential to enhance emotional, psychological, and  
72 social well-being. While Meron et al. (16) reported that folk or ballroom dancing did not prevent  
73 falls or associated physical and cognitive fall-related risk factors, other studies using in-person  
74 dance training have reported improved medial-lateral balance (17), reduced dependency of visual  
75 input for balance maintenance (18), reduced attention demands during postural tasks (17), and  
76 improved lower extremity function in older adults after as little as one weekly dance class for 12  
77 weeks (19). In addition, a feasibility study (20) recently demonstrated beneficial impact of an 8-  
78 week contemporary dance training program on the modification of both physical and psychological  
79 risk factors for falling in community-dwelling older adults. Taken together, although accumulating  
80 evidence supports the benefits of in-person dance training on healthy aging, including the risk of  
81 falls, virtually no studies have explored the potential benefits of dance training delivered digitally  
82 (online) (21). Such online-based dance training may be particularly relevant in times of restricted  
83 access to physical activity, such as during the recent COVID-19 pandemic. Moreover, while home-  
84 based and digital training have previously proven to be effective for combating physical inactivity  
85 among this population (22), less is known about whether this type of training may improve  
86 variables used for fall risk stratification in older adults, such as gait speed and postural stability.

87 Therefore, the aim of the study was to explore the benefits of a 12-week online dance  
88 training intervention the *Moving Together* (MT) program, on static and dynamic postural stability  
89 and gait speed. Static postural stability is here defined as the ability to hold an upright position as  
90 still as possible over a stable base of support, while dynamic postural stability is the ability to  
91 maintain balance, i.e., keeping the body's center of mass vertical projection within the base of  
92 support, when changes in the base of support occur (23). Throughout the evaluation of the  
93 intervention's impact on these specific physical aspects, the study also seeks to contribute valuable  
94 insights into the literature on the potential benefits of online dance training in the functional

95 performance of older adults. The hypothesis was that static postural stability, dynamic postural  
96 stability, and gait speed would improve after 12 weeks of the online MT intervention.

## 97 **Materials and Methods**

### 98 **Participants**

99 Forty-five older adults were included in this uncontrolled pre-post study (44 females;  $74 \pm 5.3$  years;  
100  $69.7 \pm 13.0$  kg;  $1.62 \pm 0.58$  m). The participants were recruited through advertisements posted at  
101 activity centers for older adults in █████ Municipality, through information meetings, by  
102 advertisement in the press, and through flyers handled out in public spaces. To ensure inclusivity,  
103 only two inclusion criteria were used: I) being 65 yrs or older, and II) being able to speak and  
104 understand █████. Due to the wide inclusion criteria, there was a broad age range for participants  
105 (65 to 87 yrs) as well as physical capacity of the participants. However, all were able to stand and  
106 walk independently. The study was approved by the █████ Committee on Health  
107 Research Ethics (N-20220045) and conducted in accordance with the Declaration of Helsinki.

### 108 **Dance training intervention**

109 The study builds upon a previous randomized controlled trial from our group (24) demonstrating that  
110 regular fitness circuit training and a combination of in-person and online dance training significantly  
111 reduced the number of fall accidents in older adults (25). In this separate study, we sought to extend  
112 this work by focusing on implementation of online dance training in practice (in the municipality).  
113 Specifically, the MT consisted of two weekly dance classes lasting 60 min each, consisting of  
114 improvisation (contemporary dance) (Day 1) and salsa (Day 2) performed for 12 weeks. The  
115 movement language of Laban's choreological practice (26) was used to inspire and create variations  
116 of movement during the contemporary dance classes, and the classes progressed in intensity. Each  
117 class started and concluded with a focus on breathing exercises. The salsa classes were built upon  
118 techniques from Cuban salsa; participants had a progressive introduction to the technique and the  
119 expressive aesthetics of the dance style. Over time, the class included dancing with faster pace. The  
120 classes were delivered by experienced professional dance instructors online through video calls using  
121 the Zoom meeting application (Zoom Video Communications, Inc., San Jose, CA, USA). For  
122 flexibility purposes, subjects could choose to attend the online classes either from home, or at one of  
123 four activity centers in the municipality. Each online class was recorded and uploaded to a designated  
124 YouTube channel connected to the project after each class.<sup>1</sup> The YouTube channel resource was made  
125 available for all participants and the public, where participants could review and replay the classes if  
126 they were unable to attend on the day. Participants were instructed to dance at least once per week  
127 but were encouraged to attend twice weekly. To promote engagement and social connection between  
128 the participants, a 60-min in-person salsa dance class was conducted once every month with physical  
129 presence by both the instructor and the participants (up to three sessions in total per subject).

### 130 **Measurements**

131 All measurements were performed immediately prior to (baseline) and following 12 weeks of dance  
132 training and were carried out at local activity centers in █████ Municipality. The same experienced  
133 investigator was present at all tests and either performed the testing or provided supervised assistance  
134 to two student helpers.

#### 135 *Static Postural Stability*

---

<sup>1</sup> █████

136 Static postural stability during a quiet standing task was assessed for 30 seconds both with and without  
137 a dual-task. A high-resolution three dimensional, four-channel, force platform (PLUX Wireless  
138 Biosignals S.A., Lisboa, Portugal) sampled at 1000Hz was placed 1.5 m from a wall. A circle (d = 5  
139 cm) was placed on the wall at approximately eye height straight out of the participants. At baseline,  
140 participants were instructed to stand on the force platform in a self-determined, comfortable position  
141 with the distance between the feet measured with a non-elastic measuring tape. The distance between  
142 the feet was then replicated at the post-test. Three single- and three dual-task recordings were  
143 performed, and participants were instructed not to move during the 30-s recording period.  
144 Measurements were calibrated prior to each participant, by recording a 10-s period with zero load on  
145 the force platform. The center of pressure (CoP) data from the force platform was extracted from the  
146 horizontal forces and filtered digitally with a low-pass filter and a 20Hz cut-off frequency. The static  
147 postural stability was then quantified from the CoP data via the 95% prediction ellipse CoP area and  
148 resultant mean CoP velocity (27). A mathematic task was used as supra-postural task during the dual-  
149 task conditions, when participants were instructed to count backwards of ‘minus 7’, starting from a  
150 random number between 0 and 500 (e.g., 40, 33, 26 etc.). The starting number for the three dual-tasks  
151 remained constant between visits. The mean of the three single-tasks and the three dual-tasks for both  
152 variables were used for analyses.

### 153 *10-m gait speed*

154 Gait speed was determined using photo gates (Brower Timing Systems, Draper, UT, USA) placed in  
155 a corridor 10 meters apart. Participants were instructed to walk as fast as possible without running  
156 (“Please walk as quickly as you can without running to the end of the corridor”). Participants started  
157 walking two meters before the start line so that gait speed did not include the acceleration time, with  
158 an additional 2-m walk-out after the participants crossed the finish line. A total of six walks were  
159 performed (6 x 10 meters), with a self-determined break in between walks. For the last three 10-m  
160 walks, participants were instructed to perform the same mathematical dual-task as for the assessment  
161 of postural control, yet with other starting numbers. For these dual-tasks, participants were instructed  
162 to walk as fast as possible without running, while counting as correctly as possible. The mean of the  
163 three single-tasks and the three dual-tasks, respectively, were used for analyses. For comparison with  
164 previous studies, the time to complete the 10-m walk was converted to speed (m/s).

### 165 *Dynamic postural stability (Mini-BESTest)*

166 Dynamic postural stability was determined using The Mini-BESTest (10). The Mini-BESTest  
167 consists of 14 items related to domains of anticipatory transitions; reactive postural control; sensory  
168 orientation; and dynamic balance during gait. The procedures for administration and scoring of the  
169 Mini-BESTest were standardized as described in (28). For each item, a score from 0 (severe) to 2  
170 (normal) was provided. Individual item scores were then summated and reported as the Mini-  
171 BESTest total score (out of the maximum attainable 28 points) (28).

## 172 **Statistics**

173 Statistical analyses were performed using SPSS software (version 27; IBM, Armonk, New York)  
174 with data reported as mean  $\pm$  SD. Statistical significance was set *a priori* at  $P < 0.05$ . Before and  
175 after comparisons on outcomes were performed using student paired t tests (two-tailed), with  
176 Bonferonni adjustment for multiple comparisons ( $n = 2$ ; gait speed with and without dual-task) by  
177 dividing 0.05 with the number of comparisons such that significance was accepted at  $P < 0.025$  for  
178 these two outcomes. Pearson product-moment correlations (or Spearman’s rank-order correlation  
179 for non-normally distributed change scores) were calculated between age and change scores ( $\Delta =$   
180 post-intervention - baseline) for outcomes to explore potential associations between age and

181 responses to the intervention. We also calculated standardized effect sizes (Cohen d) to determine  
182 the magnitude of change from baseline to post-intervention, with the following thresholds used for  
183 interpretation: small ( $>0.2$ ), moderate ( $>0.5$ ), and large ( $>0.8$ ).

## 184 **Results**

185 Of the 45 participants included at baseline, 13 dropped out, so that  $n = 32$  in total were included for  
186 analyses. All 32 participants were included in analyses irrespective of where and how they attended.  
187 Reasons for dropout included non-study related health issues ( $n = 5$ ), lack of motivation ( $n = 4$ ),  
188 COVID-19 infection ( $n = 1$ ), finding it too physically demanding to complete the dance sessions ( $n$   
189  $= 2$ ), and finding it uncomfortable being the only male ( $n = 1$ ).

### 190 *Static Postural Stability*

191 Results for static postural stability are shown in Table 1. Due to corrupted data for three  
192 participants, analyses are based on  $n = 29$ . There were no significant changes from baseline to post-  
193 intervention for either single- or dual-task CoP area or velocity ( $P \geq 0.218$ ). Due to non-normality  
194 of change scores, Spearman's rank order correlations were run to assess relationships between age  
195 and  $\Delta$  in single and dual-task CoP area and velocity. There were statistically significant correlations  
196 between age and  $\Delta$  in CoP area during single ( $r_s = 0.386$ ,  $P = 0.038$ ) and dual-task ( $r_s = 0.425$ ,  $P =$   
197  $0.022$ ), suggesting that older age was associated with a greater increase in CoP area over the 12  
198 weeks. Similarly, there was a statistically significant correlation between age and  $\Delta$  in dual-task  
199 CoP velocity ( $r_s = 0.425$ ,  $P = 0.021$ ), with no correlation between age and  $\Delta$  in single-task CoP  
200 velocity ( $r_s = 0.191$ ,  $P = 0.321$ ). The mathematical performance during the dual-task is presented in  
201 Table 2. There were no significant changes in the mathematical performance during the dual-task,  
202 either when expressed as the total number of counts, or as the relative or absolute number of correct  
203 counting's ( $P \geq 0.28$ ).

### 204 *10-m gait speed*

205 One participant was unable to complete the walking test at post-intervention, so for 10-m gait speed  
206 analyses is based on  $n = 31$ . 10-m gait speed was significantly faster after the 12 weeks of dance  
207 training ( $1.68 \pm 0.25$  m/s) compared to baseline ( $1.57 \pm 0.22$  m/s,  $P < 0.001$ ,  $d = 0.737$ , Figure 1A).  
208 After Bonferroni adjustment, there was no significant change in 10-m gait speed with dual-task  
209 from baseline ( $1.41 \pm 0.21$  m/s) to post-intervention ( $1.48 \pm 0.25$  m/s,  $P = 0.045$ ,  $d = 0.376$ , Figure  
210 1B). There were no significant correlations between age and  $\Delta$  in 10-m gait speed ( $r = -0.072$ ,  $P =$   
211  $0.699$ ) or age and  $\Delta$  in 10-m gait speed with dual-task ( $r = -0.99$ ,  $P = 0.595$ ). The mathematical  
212 performance during the dual-task is presented in Table 3.

### 213 *Dynamic Postural Stability*

214 Dynamic postural stability evaluated by the Mini-BESTest total score was significantly improved at  
215 post-intervention ( $23.88 \pm 3.01$ ) compared to baseline ( $22.56 \pm 1.41$ ,  $P = 0.007$ ,  $d = 0.52$ , Figure  
216 1C). There was no significant correlation between age and  $\Delta$  in Mini-BESTest total score ( $r =$   
217  $0.085$ ,  $P = 0.642$ ).

## 218 **Discussion**

219 When comparing the results after 12 weeks of the MT with baseline values, our initial hypotheses  
220 were only partially confirmed: I) it is not clear that static postural stability improved after the online  
221 dancing intervention, as both the CoP area and velocity variables were not significantly different  
222 between before and after intervention, II) gait speed was only faster during the conditions without

223 dual-task, however III) dynamic postural control, determined via the Mini-BESTest, was enhanced  
224 following the intervention.

### 225 *Static Postural Stability*

226 Assuming that static postural stability during a quiet standing task is achieved via controlling the  
227 body posture as if it behaves as an inverted pendulum swinging around the ankle joints (29), the  
228 optimal neuromuscular strategy to mitigate the effect of possible external perturbation is to increase  
229 the stiffness around the ankles by co-contracting the antagonistic and agonistic muscles around this  
230 joint (30). This strategy usually results in smaller and quicker displacements of the body after a  
231 perturbation, which, in laboratory settings, are usually represented by smaller areas and increased  
232 velocities of the CoP (31). Adding a supra-postural task, older adults would exhibit a decreased (I)  
233 static postural stability (32), or (II) performance of the supra-postural task when the postural task is  
234 highly demanding (33). In older adults, the capacity to carry out concurrent postural tasks is  
235 paramount for maintaining balance in daily life activities, since its deficit may increase the risk for  
236 accidental falls in this population (34). This capacity may also involve the prioritization of one of  
237 the tasks over the other, which in postural control studies is often referred to as the “postural first”  
238 principle, when the focus on maintaining the static posture stability overcomes the performance of  
239 the supra-postural task (33). Regardless of the addition or not of a supra-postural task, the present  
240 results did not show any clear change in CoP area or velocity nor in the performance of the dual-  
241 task intervention before/after. This could indicate: (I) a plateau effect, where the older adults that  
242 participated in this study already presented good static postural stability prior to the intervention,  
243 (II) a sensitivity problem, where the force platform measurement used here where not able to detect  
244 the possible variations due to training, or (iii) ineffective intervention for static postural stability  
245 since the dance training focused primarily on dynamic movements which relate to dynamic postural  
246 stability. As exploratory analyses, we also computed correlations between age and changes in  
247 postural control and gait speed to explore whether changes in these outcomes would be dependent  
248 on age. For these analyses, we found significant correlations between age and  $\Delta$  in CoP velocity  
249 (single-task only) and for age and  $\Delta$  in CoP area and velocity (both single and dual-task), thus  
250 largely confirming previous research demonstrating greater CoP parameters at older age during  
251 single- (35) and dual-task (36) platform assessments.

### 252 *Dynamic Postural Stability*

253 The ability to control the body position in space so its center of mass is within the base of support  
254 when the body suffers perturbation (dynamic balance) relies upon the available sensory information  
255 (usually vision, proprioceptive, and vestibular) to generate accurate motor responses to counter-  
256 react such perturbation and realign the vertical projection of the bodies’ center of mass within the  
257 new base of support. Such a scenario is often encountered when performing daily life activities such  
258 as walking, running, dancing, carrying objects, using transportation, doing house chores, etc. The  
259 level of performance of such activities is usually associated with accidental falls in older adults,  
260 where lower independence in performing these activities is associated with a higher risk of fall  
261 accidents in older adults (37). After 12 weeks of the online dance training intervention, the Mini-  
262 BESTest score was significantly greater compared to baseline values, with a moderate effect size.  
263 These results indicate that the MT intervention was beneficial for improving the older adults’  
264 dynamic postural stability. It is noteworthy that the baseline values for Mini-BESTest (average of  
265 22.5) were below the cutoff value of 23 points for the average age (74 years) reported in the  
266 literature (38), which indicates that on average, participants were in a higher risk for fall accidents  
267 when enrolled in the study compared to their peers. After the intervention, the average score for this  
268 test increased to approximately 24 (with an average increase of 1.5 points), which is not only above

269 the cutoff values for fall risk in that age group, but also similar in size to the minimal clinically  
270 important difference (1-2 points on the Mini-BESTest scale) when evaluating special groups such  
271 as individuals after total knee replacement (39). However, it is important to highlight that the  
272 number of fall accidents were not monitored in this study, so the real effect on fall accidents from  
273 this intervention is yet to be investigated.

#### 274 *Gait Speed*

275 Gait is also an effective way to quantify dynamic postural stability in older adults (40). In fact,  
276 increasing gait speed after training has been correlated with lower fall risks in older adults. In  
277 average, the gait speed increased 0.1 m/s after the present intervention, which even though  
278 representing a moderate change ( $d = 0.737$ ) might not be clinically relevant. The lack of relevance  
279 of this result might be related to a ceiling effect. The maximum gait speed in older populations is  
280 expected to range from 1.7 m/s (females) to 2.1 m/s (males) (41), while the average gait speed  
281 during the baseline test was 1.5 m/s (all females). It is noteworthy that according to the latest  
282 recommendations (9), gait speed should be used for fall risk stratification among older adults.  
283 Indeed, gait speeds below 1 m/s are related to a higher risk of accidental falls in older adults (12),  
284 indicating that for our participants, gait speed would not be an efficient measure for fall risk  
285 stratification. Nevertheless, after the online dance intervention, our participants reached values close  
286 to the maximum (1.6 m/s), indicating that the intervention may have provided enough stimuli for  
287 motor improvement even though the participants already exhibited high performance values at  
288 baseline. Further studies should investigate whether an online training approach is also effective for  
289 less capable participants.

#### 290 *Methodological considerations*

291 Despite the high degree of external validity in this study as the intervention was implemented in  
292 practice, in a municipal setting, the study is limited, however, by not including a control group for  
293 comparison. Thus, the results from the current study should be interpreted with some caution.  
294 Another consideration is that our results might not be generalizable to older males, as only one man  
295 was included in the study, and he dropped out due to not feeling comfortable with being  
296 outnumbered. Such overwhelming female bias is consistent with the existing literature (14,42) and  
297 should be addressed in future studies. Finally, this study is limited by the lack of control of  
298 participant attendance. Due to our focus on inclusivity and implementation, participants were  
299 allowed to play and replay the recorded dance classes from YouTube on their own, and hence we  
300 were unable to accurately record attendance. This may have resulted in some participants attending  
301 only once weekly, while others may have attended more than twice weekly. While we acknowledge  
302 this limitation, it may approximate the more real-life context of our study.

#### 303 **Conclusion**

304 In summary, while the MT online dance training intervention had a limited impact on static postural  
305 stability and gait speed, our data indicate important benefits of the intervention for dynamic postural  
306 control among older adults. Further research, including studies with stricter control of study  
307 variables, is needed to investigate the efficacy of online dance training on the number of fall  
308 accidents and to explore its effectiveness with different participant groups.

#### 309 **Acknowledgments**

311 The authors would like to thank [REDACTED] and [REDACTED] for their  
312 help with data collection; [REDACTED] for maintenance of the YouTube channel; The



313 Association of Integrated Dance in [REDACTED] for their input to the dance classes; and all the  
314 participants for their involvement in the study.

315

### 316 **Declarations of interest**

317 None

### 318 **Funding**

319 This work was supported by [TrygFonden](#) (grant number: ID: 153597). The funding sources had no  
320 role in study design, collection, analysis, and interpretation of data, writing the report, or in the  
321 decision to submit the article for publication.

322

### 323 **Figure legends**

324 **Figure 1. Mean gait speed and dynamic postural stability at baseline (Pre, black bars) and**  
325 **following 12 weeks of dance training (Post, grey bars).** (A) 10-m gait speed. (B) 10-m gait speed  
326 with a mathematical dual-task. (C) Mini-BESTest Total Score. Mini-BESTest Total Score was  
327 calculated as the sum of the 14 test items. Note that for gait speed,  $n = 31$ . Error bars represent SD.  
328 Significant difference between baseline and post-intervention at  $**P < 0.01$  and  $***P < 0.001$ .

329

## 330 References

- 331 1. Florence CS, Bergen G, Atherly A, Burns E, Stevens J, Drake C. The Medical Costs of Fatal  
332 Falls and Fall Injuries among Older Adults. *J Am Geriatr Soc Am Geriatr Soc* (2018)  
333 66:693–698. doi: 10.1111/jgs.15304.The
- 334 2. Bergen G, Stevens MR, Burns ER. Falls and Fall Injuries Among Adults Ages over 65  
335 Years. *Morbidity and Mortality Weekly Report* (2016) 65:993–998.
- 336 3. Beedham W, Peck G, Richardson SE, Tsang K, Fertleman M, Shipway DJH. Head injury in  
337 the elderly – an overview for the physician. *Clinical Medicine, Journal of the Royal College*  
338 *of Physicians of London* (2019) 19:177–184. doi: 10.7861/CLINMEDICINE.19-2-177
- 339 4. Minhui Liu, Tianxue Hou, Yuxiao Li, Xiaocao Sun, Sarah L. Szanton LC and PMD. Fear of  
340 Falling is More Important Than Previous Falls in Terms of Limiting Activities : A  
341 Longitudinal Study. *BMC Geriatr* (2021)1–17.
- 342 5. Magaziner J, Fredman L, Hawkes W, Hebel JR, Zimmerman S, Orwig DL, Wehren L.  
343 Changes in functional status attributable to hip fracture: A comparison of hip fracture  
344 patients to community-dwelling aged. *Am J Epidemiol* (2003) 157:1023–1031. doi:  
345 10.1093/aje/kwg081
- 346 6. Choi NG, Choi BY, Dinitto DM, Marti CN, Kunik ME. Fall-related emergency department  
347 visits and hospitalizations among community-dwelling older adults: Examination of health  
348 problems and injury characteristics. *BMC Geriatr* (2019) 19:1–10. doi: 10.1186/s12877-019-  
349 1329-2
- 350 7. Hartholt K, Lee R, Burns E, EF van B. Mortality From Falls AmongUSAdults Aged 75  
351 Years or Older, 2000-2016. *JAMA* (2019) 321:2131–2133. doi: 10.1016/j.jr.2015.11.002
- 352 8. Thomas E, Battaglia G, Patti A, Brusa J, Leonardi V, Palma A, Bellafiore M. Physical  
353 activity programs for balance and fall prevention in elderly. *Medicine (United States)* (2019)  
354 98:1–9. doi: 10.1097/MD.0000000000016218
- 355 9. Montero-odasso M, Velde N Van Der, Martin FC, Petrovic M, Tan MP, Ryg J, Aguilar-  
356 navarro S, Alexander NB, Becker C, Lamb SE, et al. World guidelines for falls prevention  
357 and management for older adults : a global initiative. *Age Ageing* (2022) 51:1–36.
- 358 10. Franchignoni F, Horak F, Godi M, Nardone A, Giordano A. Using psychometric techniques  
359 to improve the balance evaluation systems test: The mini-bestest. *J Rehabil Med* (2010)  
360 42:323–331. doi: 10.2340/16501977-0537
- 361 11. O’Hoski S, Sibley KM, Brooks D, Beauchamp MK. Construct validity of the BESTest, mini-  
362 BESTest and briefBESTest in adults aged 50 years and older. *Gait Posture* (2015) 42:301–  
363 305. doi: 10.1016/j.gaitpost.2015.06.006
- 364 12. Kyrдалen IL, Thingstad P, Sandvik L, Ormstad H. Associations between gait speed and well-  
365 known fall risk factors among community-dwelling older adults. *Physiotherapy Research*  
366 *International* (2019) 24:e1743. doi: 10.1002/pri.1743

- 367 13. Middleton A, Fritz SL, Lusardi M. Walking speed: The functional vital sign. *J Aging Phys*  
368 *Act* (2015) 23:314–322. doi: 10.1123/japa.2013-0236
- 369 14. Hwang PW-N, Braun KL. The Effectiveness of Dance Interventions to Improve Older  
370 Adults' Health: A Systematic Literature Review. *Altern Ther Health Med* (2015) 21:64–70.
- 371 15. Fernández-Argüelles EL, Rodríguez-Mansilla J, Antunez LE, Garrido-Ardila EM, Muñoz  
372 RP. Effects of dancing on the risk of falling related factors of healthy older adults: A  
373 systematic review. *Arch Gerontol Geriatr* (2015) 60:1–8. doi: 10.1016/j.archger.2014.10.003
- 374 16. Merom D, Mathieu E, Cerin E, Morton RL, Simpson JM, Rissel C, Anstey KJ, Sherrington  
375 C, Lord SR, Cumming RG. Social Dancing and Incidence of Falls in Older Adults: A Cluster  
376 Randomised Controlled Trial. *PLoS Med* (2016) 13:1–19. doi:  
377 10.1371/journal.pmed.1002112
- 378 17. Sirois-Leclerc G, Remaud A, Bilodeau M. Dynamic postural control and associated  
379 attentional demands in contemporary dancers versus non-dancers. *PLoS One* (2017)  
380 12:e0173795. doi: 10.1371/journal.pone.0173795
- 381 18. Golomer E, Dupui P, Monod H. The effects of maturation on self-induced dynamic body  
382 sway frequencies of girls performing acrobatics or classical dance. *Eur J Appl Physiol* (1997)  
383 76:140–144. doi: 10.1007/s004210050226
- 384 19. Keogh JWL, Kilding A, Pidgeon P, Ashley L, Gillis D. Effects of different weekly  
385 frequencies of dance on older adults' functional performance and physical activity patterns.  
386 *Eur J Sports Exerc Sci* (2012) 1:14–23.
- 387 20. Britten L, Addington C, Astill S. Dancing in time: Feasibility and acceptability of a  
388 contemporary dance programme to modify risk factors for falling in community dwelling  
389 older adults. *BMC Geriatr* (2017) 17: doi: 10.1186/s12877-017-0476-6
- 390 21. Coelho C, Menon S. Online Dance Training in a Social Distancing Environment: Examining  
391 Preferences of Latin and Ballroom Dancers. *Dance Education in Practice* (2020) 6:23–29.  
392 doi: 10.1080/23734833.2020.1831856
- 393 22. Chaabene H, Prieske O, Herz M, Moran J, Höhne J, Kliegl R, Ramirez-Campillo R, Behm  
394 DG, Hortobágyi T, Granacher U. Home-based exercise programmes improve physical fitness  
395 of healthy older adults: A PRISMA-compliant systematic review and meta-analysis with  
396 relevance for COVID-19. *Ageing Res Rev* (2021) 67:101265. doi: 10.1016/j.arr.2021.101265
- 397 23. Winter DA, Patla AE, Frank JS. Assessment of balance control in humans. *Med Prog*  
398 *Technol* (1990) 16:31–51.
- 399 24. [REDACTED]  
400 [REDACTED]  
401 [REDACTED]
- 402 25. [REDACTED]  
403 [REDACTED]  
404 [REDACTED]

- 405 26. Newlove J, Dalby J. *Laban for All*. New York: Routledge (2004). 256 p.
- 406 27. Duarte M. Comments on “ellipse area calculations and their applicability in posturography”  
407 (schubert and kirchner, vol.39, pages 518-522, 2014). *Gait Posture* (2015) 41:44–45. doi:  
408 10.1016/j.gaitpost.2014.08.008
- 409 28. King L, Horak F. On the Mini-BESTest: Scoring and the Reporting of Total Scores. *Phys*  
410 *Ther* (2013) 93:571–575. doi: 10.2959/logo.2002.13.2.109
- 411 29. Caron O, Faure B, Brenière Y. Estimating the centre of gravity of the body on the basis of  
412 the centre of pressure in standing posture. *J Biomech* (1997) 30:1169–1171. doi:  
413 10.1016/S0021-9290(97)00094-8
- 414 30. Fitzpatrick RC, Gorman RB, Burke D, Gandevia SC. Postural proprioceptive reflexes in  
415 standing human subjects: bandwidth of response and transmission characteristics. *J Physiol*  
416 (1992) 458:69–83. doi: 10.1113/jphysiol.1992.sp019406
- 417 31. Winter DA, Patla AE, Prince F, Ishac M, Gielo-perczak K. Stiffness control of balance in  
418 quiet standing. *J Neurophysiol* (1998) 80:1211–1221. doi: 10.1152/jn.1998.80.3.1211
- 419 32. Petrigna L, Gentile A, Mani D, Pajaujiene S, Zanotto T, Thomas E, Paoli A, Palma A,  
420 Bianco A. Dual-Task Conditions on Static Postural Control in Older Adults: A Systematic  
421 Review and Meta-Analysis. *J Aging Phys Act* (2020) 29:162–177.
- 422 33. Lion A, Spada RS, Bosser G, Gauchard GC, Anello G, Bosco P, Calabrese S, Iero A, Stella  
423 G, Elia M, et al. “Postural First” Principle When Balance Is Challenged in Elderly People.  
424 *International Journal of Neuroscience* (2014) 124:558–566. doi:  
425 10.3109/00207454.2013.864288
- 426 34. Nachreiner NM, Findorff MJ, Wyman JF, McCarthy TC. Circumstances and consequences  
427 of falls in community-dwelling older women. *J Womens Health* (2007) 16:1437–1446. doi:  
428 10.1089/jwh.2006.0245
- 429 35. Liang HW, Chi SY, Tai TL, Li YH, Hwang YH. Impact of age on the postural stability  
430 measured by a virtual reality tracker-based posturography and a pressure platform system.  
431 *BMC Geriatr* (2022) 22: doi: 10.1186/s12877-022-03195-0
- 432 36. Condron JE, Hill KD. Reliability and validity of a dual-task force platform assessment of  
433 balance performance: Effect of age, balance impairment, and cognitive task. *J Am Geriatr*  
434 *Soc* (2002) 50:157–162. doi: 10.1046/j.1532-5415.2002.50022.x
- 435 37. Çınarlı T, Koç Z. Fear and Risk of Falling, Activities of Daily Living, and Quality of Life:  
436 Assessment When Older Adults Receive Emergency Department Care. *Nurs Res* (2017)  
437 66:330–335. doi: 10.1097/NNR.0000000000000227
- 438 38. Magnani PE, Genovez MB, Porto JM, Zanellato NFG, Alvarenga IC, Freire RC, De Abreu  
439 DCC. Use of the BESTest and the Mini-BESTest for fall risk prediction in community-  
440 dwelling older adults between 60 and 102 years of age. *Journal of Geriatric Physical*  
441 *Therapy* (2020) 43:179–184. doi: 10.1519/JPT.0000000000000236

- 442 39. Chan ACM, Pang MYC, Ouyang H, Jehu DAM. Minimal Clinically Important Difference of  
443 Four Commonly Used Balance Assessment Tools in Individuals after Total Knee  
444 Arthroplasty: A Prospective Cohort Study. *PM and R* (2020) 12:238–245. doi:  
445 10.1002/pmrj.12226
- 446 40. Winter DA. Human balance and posture control during standing and walking. *Gait* (1995)  
447 3:193–214.
- 448 41. Bohannon RW. Comfortable and maximum walking speed of adults aged 20-79 years:  
449 Reference values and determinants. *Age Ageing* (1997) 26:15–19. doi:  
450 10.1093/ageing/26.1.15
- 451 42. Mattle M, Chocano-Bedoya PO, Fischbacher M, Meyer U, Abderhalden LA, Lang W,  
452 Mansky R, Kressig RW, Steurer J, Orav EJ, et al. Association of Dance-Based Mind-Motor  
453 Activities with Falls and Physical Function among Healthy Older Adults: A Systematic  
454 Review and Meta-analysis. *JAMA Netw Open* (2020) 3:1–19. doi:  
455 10.1001/jamanetworkopen.2020.17688
- 456
- 457

458  
459  
460

Table 1. Static postural stability assessed via area and velocity of center of pressure (CoP) during 30s of quiet standing with and without a dual mathematical load at baseline and after 12 weeks of online dance training (n = 29\*)

|                                  | <b>Baseline</b> | <b>Post-intervention</b> | <b>P-value</b> | <b>Effect size (d)</b> |
|----------------------------------|-----------------|--------------------------|----------------|------------------------|
| <b>CoP Area (cm<sup>2</sup>)</b> |                 |                          |                |                        |
| Single task                      | 2.50 ± 2.43     | 2.08 ± 1.33              | 0.351          | 0.176                  |
| Dual task                        | 3.83 ± 3.26     | 3.47 ± 3.43              | 0.430          | 0.149                  |
| <b>CoP Velocity (cm/s)</b>       |                 |                          |                |                        |
| Single task                      | 1.29 ± 0.42     | 1.28 ± 0.50              | 0.889          | 0.026                  |
| Dual task                        | 1.70 ± 0.69     | 1.90 ± 1.06              | 0.218          | 0.234                  |

461 \* Due to corrupted data for three participants, n = 29.

462  
463

464 Table 2. Performance during the dual-tasks consisting of respectively 30s of quiet standing and 10-m gait with a dual  
465 mathematical load (counting backwards of minus 7) at baseline and after 12 weeks of online dance training

|                                                                    | <b>Baseline</b> | <b>Post-intervention</b> | <b>P-value</b> | <b>Effect size (d)</b> |
|--------------------------------------------------------------------|-----------------|--------------------------|----------------|------------------------|
| <b>Mathematical performance, quiet standing (n=29<sup>a</sup>)</b> |                 |                          |                |                        |
| Total # counted (n)                                                | 8.63 ± 3.76     | 9.05 ± 3.10              | 0.28           | 0.20                   |
| Correctly # counted (n)                                            | 7.63 ± 3.40     | 8.05 ± 3.00              | 0.307          | 0.22                   |
| Correctly # counted (%)                                            | 88 ± 10         | 89 ± 11                  | 0.796          | 0.05                   |
| <b>Mathematical performance, 10-m gait (n=30<sup>b</sup>)</b>      |                 |                          |                |                        |
| Total # counted (n)                                                | 2.46 ± 0.92     | 2.72 ± 0.94              | 0.062          | 0.36                   |
| Correctly # counted (n)                                            | 2.14 ± 0.87     | 2.36 ± 0.99              | 0.146          | 0.27                   |
| Correctly # counted (%)                                            | 85 ± 20         | 85 ± 18                  | 0.978          | 0.01                   |

466 <sup>a</sup> Due to corrupted data for three participants, n = 29.

467 <sup>b</sup> Due to knee injury at post-test (n=1) and missing registration of counts (n=1), n = 30.

**A****10-m gait**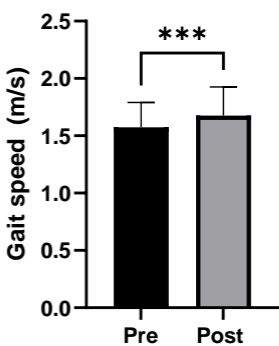**B****10-m gait (dual-task)**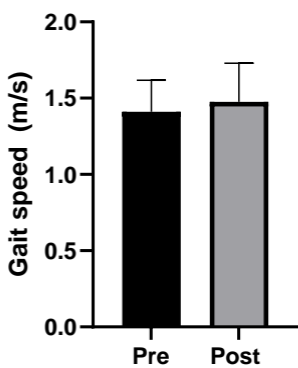**C****Dynamic postural stability**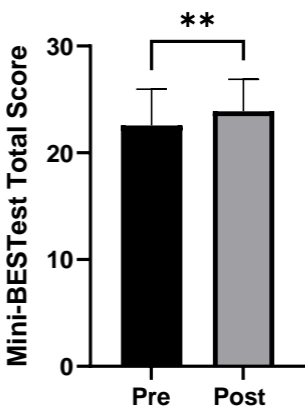

Source: https://www.medrxiv.org/content/10.1101/2023.11.01.23297899v2.full.pdf
